# Supplementary material for: Oecophylla smaragdina (Hymenoptera: Formicidae): A Biological Control Agent of the Invasive Bagworms Metisa plana (Lepidoptera: Psychidae)
Source: Research Square preprint supplement (doi:10.21203/rs.3.rs-7215952/v1), 2025-08-05
Supplement: Supplementary file 1 [file 13e2791370435b1cb7eb71c4.docx]

***Oecophylla smaragdina* (Hymenoptera: Formicidae): A Biological Control Agent of the Invasive Bagworms *Metisa plana* (Lepidoptera: Psychidae)**

Moïse Pierre Exélis1, 2

1Institute of Biological Sciences, Faculty of Science, Universiti Malaya, Lembah Pantai, 50603 Kuala Lumpur, Malaysia

2Direction de l'Enseignement Supérieur et de la Recherche Espace Etudiants, Hôtel de la Collectivité Territoriale de la Martinique (CTM), Rue Gaston Defferre - Cluny - CS 30137 - 97201 Fort-de-France, Martinique

**Supplementary materials (tables & figures)**

**Tables**

**Table 1.** Occupancy level strength – Foliar injury level

| Occupancy strength level* | Number of Occupied Palm | Nest average/colony |
| --- | --- | --- |
| 0 | 0 | 0 |
| 1 | 1 | 1-3 |
| 2 | 2-3 | 4-11 |
| 3 | 4-6 | 12-20 |
| 4 | 7-12 | ≥21 |

|  |  |  |
| --- | --- | --- |

| *M. plana* injury level | Palm tree canopy condition |
| --- | --- |
| 0 | Healthy and green – an absence of lesions (Figure 1 E-F) |
| 1 | Some small dried spots on the leaflet surface- low (Figure 1 D) |
| 2 | Many holes - moderate lesions (Figure 2 C) |
| 3 | Severe lesions –critical (Figure 1 B) |
| 4 | Necrosis leaving fronds as a skeleton – extreme (Figure 1 A) |

**O. smaragdina* occupation (see Figs. 1 A-F in main manuscript text)

**Table 2.** Associated host plants

| Estates: names – locations | Colloquial / local names | Scientific names | References-citations /current surveys (CS) |
| --- | --- | --- | --- |
| Felda Gunung Besout  Perak | Mango – Key lime –  Calamansi – Durian | *Mangifera indica – Citrus*  *aurantiifolia-Citrofortunella microcarpa - Durio zibethinus* | Lim *et al*., 2008- CS |
| MPOB Teluk Intan Perak | Watery rose apple | *Syzygium aqueum* | Exélis & Idris,  2013 |
| 1UM plantations Kota Tinggi, johor | Rambutan – langsat –Coconut, mango, key lime – range of diverse medicinal plants | *Nephelium lappaceum - lancium*  *Domesticum - Cocos nucifera – C. aurantiifolia* | Lim, 2007-CS |
| Felcra Johor | Mangosteen | *Garcinia mangostana* | CS |
| Felda Keratong/Pekan Pahang | Rambutan, mango | *N. lappaceum – M. indica -* | CS |

1Possessing same plants as Felda Perak

**Table 3.** Surveys-Census of *O. smaragdina* versus *M. plana*

| **Census** | Felda Gunung Besout 03 Rahim Mohammad Lot - Plantation area surface: 4 ha  Total number of planted palms: 550; Age: 7 by 2020;  Genetic variety: DP- Dura Pisifera; Height: 3-7 m | | | | |
| --- | --- | --- | --- | --- | --- |
| Foliar injury level | 0a | 0a | 2 | 3 | 4 |
| Pest density level | 0a | 0a | 2 | 3 | 4 |
| Foliar condition | Healthy | Healthy | Small holes | Necrosis from late instar larvae chewing | Skeleton view with total absence of green |
| Average healthy palms % | 11.63 | 11.27 | 0 | 0 | 0 |
| Average Number of palms | 84 | 62 | 67 | 326 | 21 |
| Average % occupied/unoccupied palms by ants* | 11.63 | 13.1 | 12.18* | 59.27* | 3.81* |
| Strength level of occupation** | 4 | 4 & 3 | 0 | 0 | 0 |
| Total number of matured colony | 8 | 6  2 pre-matured | 0 | 0 | 0 |
| Average occupied* palms range by ants | 7-10 | 5-8 | none | none | none |
| Average nest number range per palm | 1-7 | 1-7 | 0 | 0 | 0 |
| Average nest number range per colony | 38-46 | 20-35 | 0 | 0 | 0 |
| Host plant species density | Durian: 1, Citrus: 2, mango: 1 unidentified plants: 5 | Citrus: 1  Unidentified plants: 3 | 0 | 0 | 0 |
| Antagonistic ant species  *Solenopsis spp.*  presence | Nil | Nil | Active | Active | Active |
| Antagonistic ant species  *D. thoracicus* presence  Other species*** | No ground/tree activity detection | No activity detected | Nil  *Odontoponera denticulata****  *Solenopsis geminata* | Nil  *O. denticulata*  *S. geminata* | Nil  *O. denticulata*  *S. geminata* |

Note: *Corresponds to unoccupied oil palm trees. ***O. smaragdina* occupation strength ranging from 0 to 4. ***Many nest holes entrance/exit detected with a significant presence for *O. denticulata;* Tunnel passages made of soils characteristic of *S. geminata*. aAntagonistic ants absent under foliar injury and a bagworm density level of 0 and 1 (no activity detected).

**Table 4. Performance summary – Year 2019 - 2022**

Descriptive analysis

| Overall  > summary(dt)  Year Months TCI Average_Yield_permth_ha  Min. :2019 Length:240 Length:240 Min. : 2.930  1st Qu.:2020 Class :character Class :character 1st Qu.: 4.077  Median :2020 Mode :character Mode :character Median : 6.445  Mean :2020 Mean : 8.000  3rd Qu.:2021 3rd Qu.:10.928  Max. :2022 Max. :21.650  OER_percent Total_Yield_ton_perhectar Incomes_RM  Min. :17.05 Min. :11.72 Min. : 5064  1st Qu.:18.63 1st Qu.:16.31 1st Qu.: 8611  Median :18.95 Median :25.78 Median :24771  Mean :18.79 Mean :32.04 Mean :25529  3rd Qu.:19.19 3rd Qu.:43.71 3rd Qu.:35130  Max. :20.01 Max. :86.60 Max. :94134 |
| --- |
| > summary(dt_bc_ant)  Year Months TCI Average_Yield_permth_ha  Min. :2019 Length:48 Length:48 Min. :12.54  1st Qu.:2020 Class :character Class :character 1st Qu.:15.34  Median :2020 Mode :character Mode :character Median :15.93  Mean :2020 Mean :16.05  3rd Qu.:2021 3rd Qu.:16.24  Max. :2022 Max. :21.65  OER_percent Total_Yield_ton_perhectar Incomes_RM  Min. :19.41 Min. :50.16 Min. :21370  1st Qu.:19.61 1st Qu.:61.42 1st Qu.:28629  Median :19.68 Median :63.74 Median :36532  Mean :19.69 Mean :64.45 Mean :48403  3rd Qu.:19.78 3rd Qu.:65.31 3rd Qu.:62027  Max. :20.01 Max. :86.60 Max. :94134 |
| > summary(dt_tci_1)  Year Months TCI Average_Yield_permth_ha  Min. :2019 Length:48 Length:48 Min. : 3.480  1st Qu.:2020 Class :character Class :character 1st Qu.: 4.725  Median :2020 Mode :character Mode :character Median : 5.855  Mean :2020 Mean : 6.503  3rd Qu.:2021 3rd Qu.: 8.045  Max. :2022 Max. :11.790  OER_percent Total_Yield_ton_perhectar Incomes_RM  Min. :17.05 Min. :13.92 Min. : 5874  1st Qu.:18.05 1st Qu.:18.90 1st Qu.: 9949  Median :18.85 Median :23.42 Median :15125  Mean :18.57 Mean :26.01 Mean :21065  3rd Qu.:19.02 3rd Qu.:32.18 3rd Qu.:31593  Max. :19.31 Max. :47.16 Max. :45038 |
| > summary(dt_tci_2)  Year Months TCI Average_Yield_permth_ha  Min. :2019 Length:48 Length:48 Min. : 3.080  1st Qu.:2020 Class :character Class :character 1st Qu.: 4.595  Median :2020 Mode :character Mode :character Median : 6.195  Mean :2020 Mean : 6.721  3rd Qu.:2021 3rd Qu.: 8.660  Max. :2022 Max. :11.860  OER_percent Total_Yield_ton_perhectar Incomes_RM  Min. :17.05 Min. :12.32 Min. : 5199  1st Qu.:18.05 1st Qu.:18.38 1st Qu.: 9402  Median :18.85 Median :24.78 Median :16661  Mean :18.57 Mean :26.89 Mean :22296  3rd Qu.:19.02 3rd Qu.:34.64 3rd Qu.:35621  Max. :19.31 Max. :47.44 Max. :45306 |
| > summary(dt_tci_3)  Year Months TCI Average_Yield_permth_ha  Min. :2019 Length:48 Length:48 Min. : 3.000  1st Qu.:2020 Class :character Class :character 1st Qu.: 3.650  Median :2020 Mode :character Mode :character Median : 4.090  Mean :2020 Mean : 5.657  3rd Qu.:2021 3rd Qu.: 7.715  Max. :2022 Max. :11.790  OER_percent Total_Yield_ton_perhectar Incomes_RM  Min. :17.05 Min. :12.00 Min. : 5064  1st Qu.:18.05 1st Qu.:14.60 1st Qu.: 7419  Median :18.85 Median :16.36 Median :12670  Mean :18.57 Mean :22.61 Mean :18952  3rd Qu.:19.02 3rd Qu.:30.86 3rd Qu.:30732  Max. :19.31 Max. :47.16 Max. :45038 |
| > dt_tci_4 <- subset(dt, TCI == "TCI OPP IV")  > summary(dt_tci_4)  Year Months TCI Average_Yield_permth_ha  Min. :2019 Length:48 Length:48 Min. : 2.930  1st Qu.:2020 Class :character Class :character 1st Qu.: 3.260  Median :2020 Mode :character Mode :character Median : 3.630  Mean :2020 Mean : 5.065  3rd Qu.:2021 3rd Qu.: 6.810  Max. :2022 Max. :11.470  OER_percent Total_Yield_ton_perhectar Incomes_RM  Min. :17.05 Min. :11.72 Min. : 5127  1st Qu.:18.05 1st Qu.:13.04 1st Qu.: 6690  Median :18.85 Median :14.52 Median :10443  Mean :18.57 Mean :20.26 Mean :16927  3rd Qu.:19.02 3rd Qu.:27.24 3rd Qu.:26941  Max. :19.31 Max. :45.88 Max. :43815 |

**Table 5. Generalised additive model (GAM) of second degree polynomial**

| # Fit GAM with a Gamma Distribution and Log Link Function  y <- dt$Incomes_RM  x1 <- dt$Average_Yield_permth_ha  x2 <- dt$Total_Yield_ton_perhectar  x3 <- dt$OER_percent  ## Fitting GAM with gamma and log link function  model_gam1 <- gam(y ~ s(x1) , family = Gamma(link = "log"), data = dt)  model_gam2 <- gam(y ~ s(x2) , family = Gamma(link = "log"), data = dt)  model_gam3 <- gam(y ~ s(x3), family = Gamma(link = "log"), data = dt)  model_gam4 <- gam(y ~ s(x1) + s(x2), family = Gamma(link = "log"), data = dt)  model_gam5 <- gam(y ~ s(x1) + s(x3), family = Gamma(link = "log"), data = dt)  model_gam6 <- gam(y ~ s(x2) + s(x3), family = Gamma(link = "log"), data = dt)  model_gam7 <- gam(y ~ s(x1) + s(x2) + s(x3), family = Gamma(link = "log"), data = dt) |
| --- |
| > summary(model_gam1)  Family: Gamma  Link function: log  Formula:  y ~ s(x1)  Parametric coefficients:  Estimate Std. Error t value Pr(>|t|)  (Intercept) 9.90447 0.02053 482.4 <2e-16 ***  ---  Signif. codes: 0 ‘***’ 0.001 ‘**’ 0.01 ‘*’ 0.05 ‘.’ 0.1 ‘ ’ 1  Approximate significance of smooth terms:  edf Ref.df F p-value  s(x1) 6.002 7.17 172.5 <2e-16 ***  ---  Signif. codes: 0 ‘***’ 0.001 ‘**’ 0.01 ‘*’ 0.05 ‘.’ 0.1 ‘ ’ 1  R-sq.(adj) = 0.838 Deviance explained = 84.4%  GCV = 0.095639 Scale est. = 0.10116 n = 240  > summary(model_gam2)  Family: Gamma  Link function: log  Formula:  y ~ s(x2)  Parametric coefficients:  Estimate Std. Error t value Pr(>|t|)  (Intercept) 9.90596 0.02068 479.1 <2e-16 ***  ---  Signif. codes: 0 ‘***’ 0.001 ‘**’ 0.01 ‘*’ 0.05 ‘.’ 0.1 ‘ ’ 1  Approximate significance of smooth terms:  edf Ref.df F p-value  s(x2) 5.071 6.168 197.3 <2e-16 ***  ---  Signif. codes: 0 ‘***’ 0.001 ‘**’ 0.01 ‘*’ 0.05 ‘.’ 0.1 ‘ ’ 1  R-sq.(adj) = 0.811 Deviance explained = 83.8%  GCV = 0.098023 Scale est. = 0.1026 n = 240  > summary(model_gam3)  Family: Gamma  Link function: log  Formula:  y ~ s(x3)  Parametric coefficients:  Estimate Std. Error t value Pr(>|t|)  (Intercept) 9.98073 0.03087 323.3 <2e-16 ***  ---  Signif. codes: 0 ‘***’ 0.001 ‘**’ 0.01 ‘*’ 0.05 ‘.’ 0.1 ‘ ’ 1  Approximate significance of smooth terms:  edf Ref.df F p-value  s(x3) 1.43 1.735 221.5 <2e-16 ***  ---  Signif. codes: 0 ‘***’ 0.001 ‘**’ 0.01 ‘*’ 0.05 ‘.’ 0.1 ‘ ’ 1  R-sq.(adj) = 0.556 Deviance explained = 57.9%  GCV = 0.24766 Scale est. = 0.2287 n = 240  > summary(model_gam4)  Family: Gamma  Link function: log  Formula:  y ~ s(x1) + s(x2)  Parametric coefficients:  Estimate Std. Error t value Pr(>|t|)  (Intercept) 9.90445 0.02058 481.4 <2e-16 ***  ---  Signif. codes: 0 ‘***’ 0.001 ‘**’ 0.01 ‘*’ 0.05 ‘.’ 0.1 ‘ ’ 1  Approximate significance of smooth terms:  edf Ref.df F p-value  s(x1) 6.024 7.191 34.025 <2e-16 ***  s(x2) 1.000 1.001 0.012 0.915  ---  Signif. codes: 0 ‘***’ 0.001 ‘**’ 0.01 ‘*’ 0.05 ‘.’ 0.1 ‘ ’ 1  R-sq.(adj) = 0.838 Deviance explained = 84.4%  GCV = 0.096445 Scale est. = 0.1016 n = 240  > summary(model_gam5)  Family: Gamma  Link function: log  Formula:  y ~ s(x1) + s(x3)  Parametric coefficients:  Estimate Std. Error t value Pr(>|t|)  (Intercept) 9.89066 0.01687 586.3 <2e-16 ***  ---  Signif. codes: 0 ‘***’ 0.001 ‘**’ 0.01 ‘*’ 0.05 ‘.’ 0.1 ‘ ’ 1  Approximate significance of smooth terms:  edf Ref.df F p-value  s(x1) 8.198 8.833 66.284 <2e-16 ***  s(x3) 8.706 8.966 9.972 <2e-16 ***  ---  Signif. codes: 0 ‘***’ 0.001 ‘**’ 0.01 ‘*’ 0.05 ‘.’ 0.1 ‘ ’ 1  R-sq.(adj) = 0.844 Deviance explained = 89.1%  GCV = 0.073024 Scale est. = 0.068307 n = 240  > summary(model_gam6)  Family: Gamma  Link function: log  Formula:  y ~ s(x2) + s(x3)  Parametric coefficients:  Estimate Std. Error t value Pr(>|t|)  (Intercept) 9.89185 0.01712 577.9 <2e-16 ***  ---  Signif. codes: 0 ‘***’ 0.001 ‘**’ 0.01 ‘*’ 0.05 ‘.’ 0.1 ‘ ’ 1  Approximate significance of smooth terms:  edf Ref.df F p-value  s(x2) 8.183 8.824 63.874 <2e-16 ***  s(x3) 8.736 8.971 9.761 <2e-16 ***  ---  Signif. codes: 0 ‘***’ 0.001 ‘**’ 0.01 ‘*’ 0.05 ‘.’ 0.1 ‘ ’ 1  R-sq.(adj) = 0.817 Deviance explained = 88.7%  GCV = 0.075793 Scale est. = 0.070324 n = 240  > summary(model_gam7)  Family: Gamma  Link function: log  Formula:  y ~ s(x1) + s(x2) + s(x3)  Parametric coefficients:  Estimate Std. Error t value Pr(>|t|)  (Intercept) 9.8906 0.0169 585.1 <2e-16 ***  ---  Signif. codes: 0 ‘***’ 0.001 ‘**’ 0.01 ‘*’ 0.05 ‘.’ 0.1 ‘ ’ 1  Approximate significance of smooth terms:  edf Ref.df F p-value  s(x1) 8.202 8.835 11.314 <2e-16 ***  s(x2) 1.000 1.000 0.290 0.591  s(x3) 8.717 8.968 9.967 <2e-16 ***  ---  Signif. codes: 0 ‘***’ 0.001 ‘**’ 0.01 ‘*’ 0.05 ‘.’ 0.1 ‘ ’ 1  R-sq.(adj) = 0.843 Deviance explained = 89.2%  GCV = 0.073561 Scale est. = 0.068581 n = 240 |
| ## AIC and degrees of freedom values  round(AIC(model_gam1,model_gam2,model_gam3,model_gam4,  model_gam5,model_gam6,model_gam7),3)  round(BIC(model_gam1,model_gam2,model_gam3,model_gam4,  model_gam5,model_gam6,model_gam7),3)  > round(AIC(model_gam1,model_gam2,model_gam3,model_gam4,  + model_gam5,model_gam6,model_gam7),3)  df AIC  model_gam1 8.002 4857.652  model_gam2 7.071 4863.224  model_gam3 3.430 5090.171  model_gam4 9.025 4859.745  model_gam5 18.904 4789.762  model_gam6 18.919 4798.618  model_gam7 19.918 4791.485  > round(BIC(model_gam1,model_gam2,model_gam3,model_gam4,  + model_gam5,model_gam6,model_gam7),3)  df BIC  model_gam1 8.002 4885.504  model_gam2 7.071 4887.834  model_gam3 3.430 5102.110  model_gam4 9.025 4891.156  model_gam5 18.904 4855.560  model_gam6 18.919 4864.470  model_gam7 19.918 4860.814 |

**Figures**

**
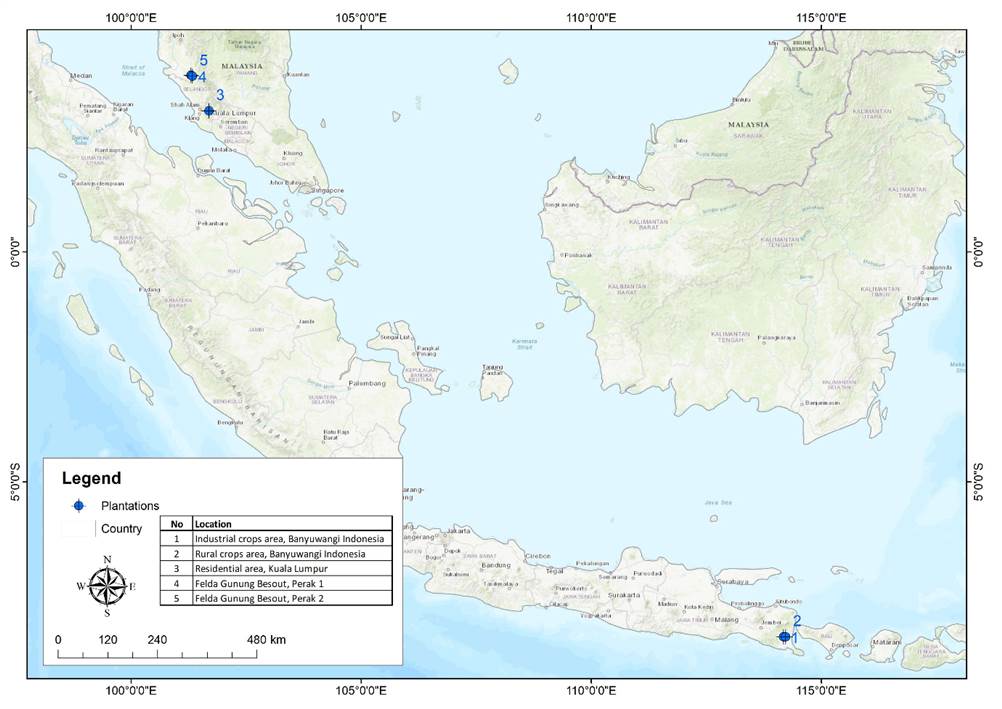
**

**Fig. 1.** Map location of the studied site showing the diverse overall sampling points and the main focus study in Felda Gunung Besout Perak, North Peninsular Malaysia, and Indonesia Banyuwangi East Java. Source: Associate Professor Sr Ts. Gs. Dr. Khairul Nizam Abdul Maulud, Head, Earth Observation Centre, Institute of Climate Change, Universiti Kebangsaan Malaysia.

**
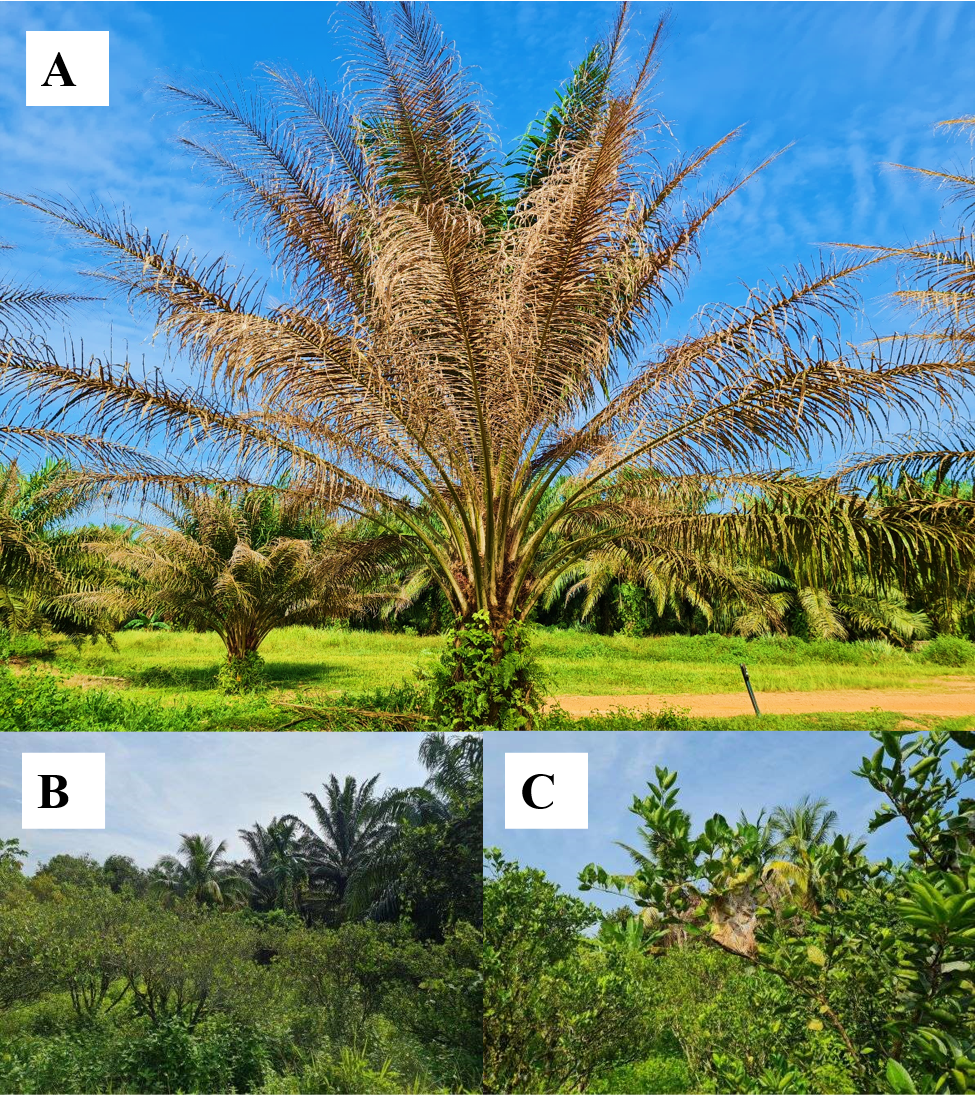
**

**Fig. 2A-C.** Affected short palm tree canopies (A). Occupied Calamansi orchard trees within the oil palm plantation blocks (B).Brood nest translocate to nearby infested palm canopies (C).

**Foliar Injury - Occupancy Level Strength.** Foliar injury and occupancy level strength follow Exélis & Azarae’s method (2013). The foliar injury is defined following the symptoms of the lesion affecting palm tree canopies, detected by visual direct observation, determined by an index ranging from zero to four (Supplementary Table 1). The presence of weaver ant colonies was categorized into four levels of strength (Way & Khoo, 1991) per palm (Supplementary Table 1); under an occupancy level strength of 3 and 4, oil palm tree canopies exhibited healthy foliage with the absence of bagworms, while unoccupied and low levels of occupancy featured a critical to skeleton foliar injury condition (Fig. 2 A-F; Supplementary Table 2). Economic threshold level (ETL) represents the point at which intervention is warranted to prevent pest populations from reaching damaging levels exceeding the cost of implementing control measures. Economic injury level (EIL) refers to the lowest pest population density level that requires the immediate initiation of pest management actions.


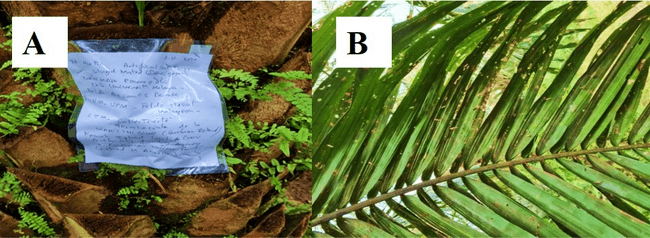
 **Fig. 3A-B.** Setting up artificial nests to lure mated green winged queens in Felda Gunung Besout, Perak. A: Tagged ID plot. B: Foliar injury level 2. Photo Credit (Moïse Pierre Exélis).


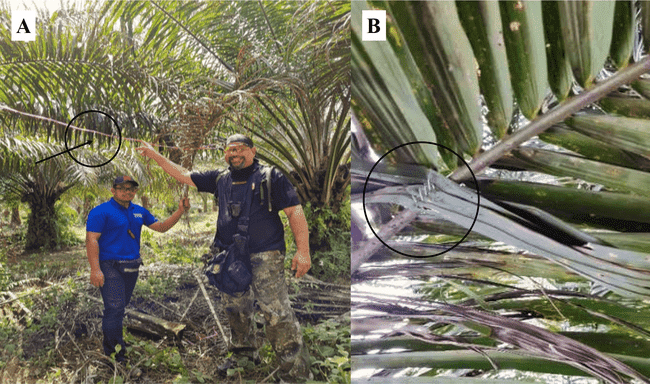
 **Fig. 4A-B**. A: Artificial line bridge network setup (black circle arrow) helps the colonies' expansion. B: Fixed artificial nest on rachis by industrial staple tacker (black circle). Photo Credit (Moïse Pierre Exélis).

**
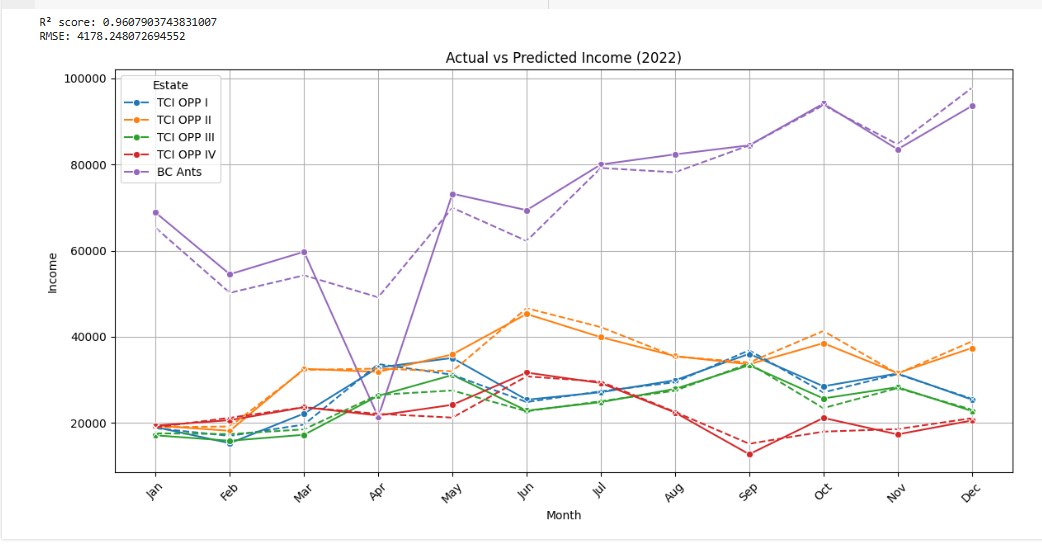
**

**
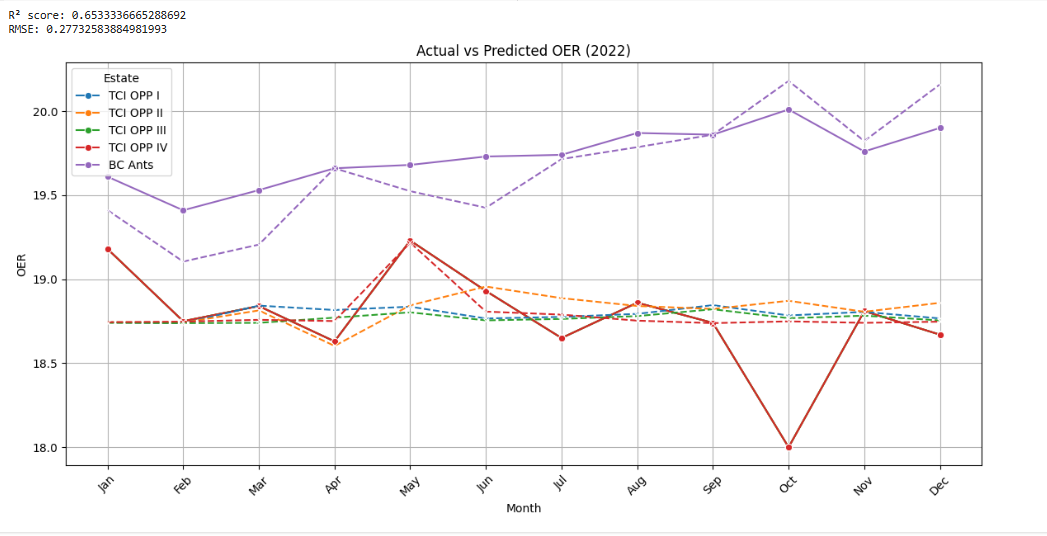
**

**
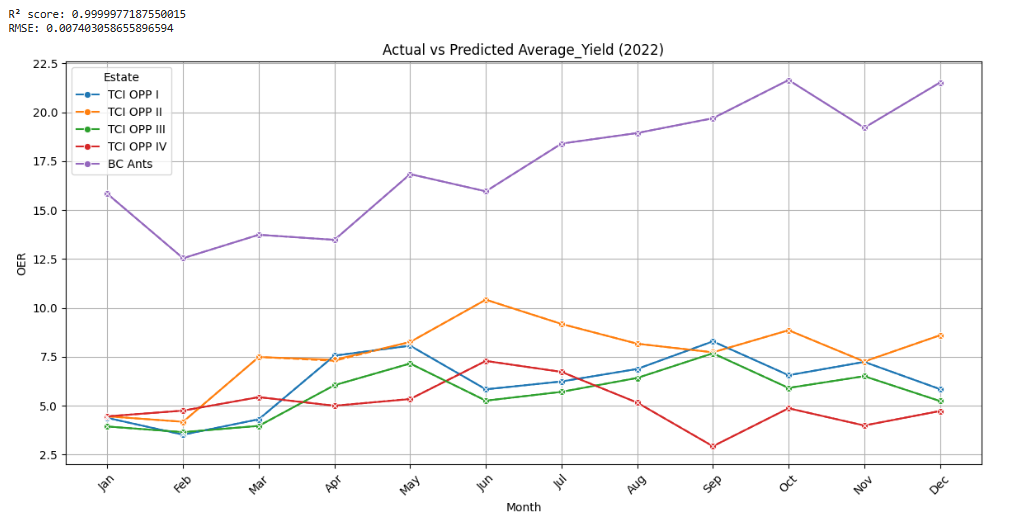
**

**
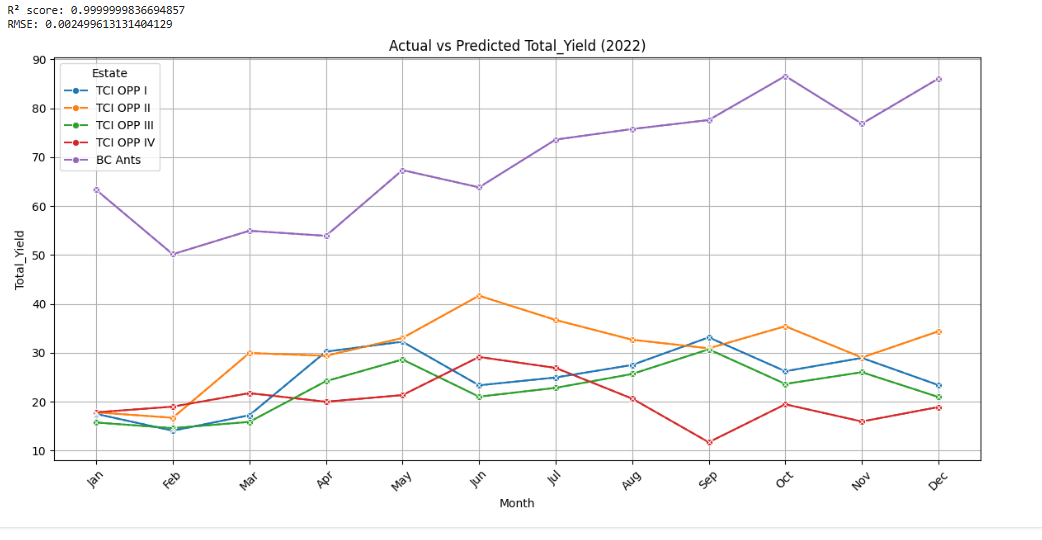
Fig. 5A-D (2022).** Graphics describing incomes, OER, average and total yield differences between trunk chemical injection (TCI) and biological control ants (BC Ants).


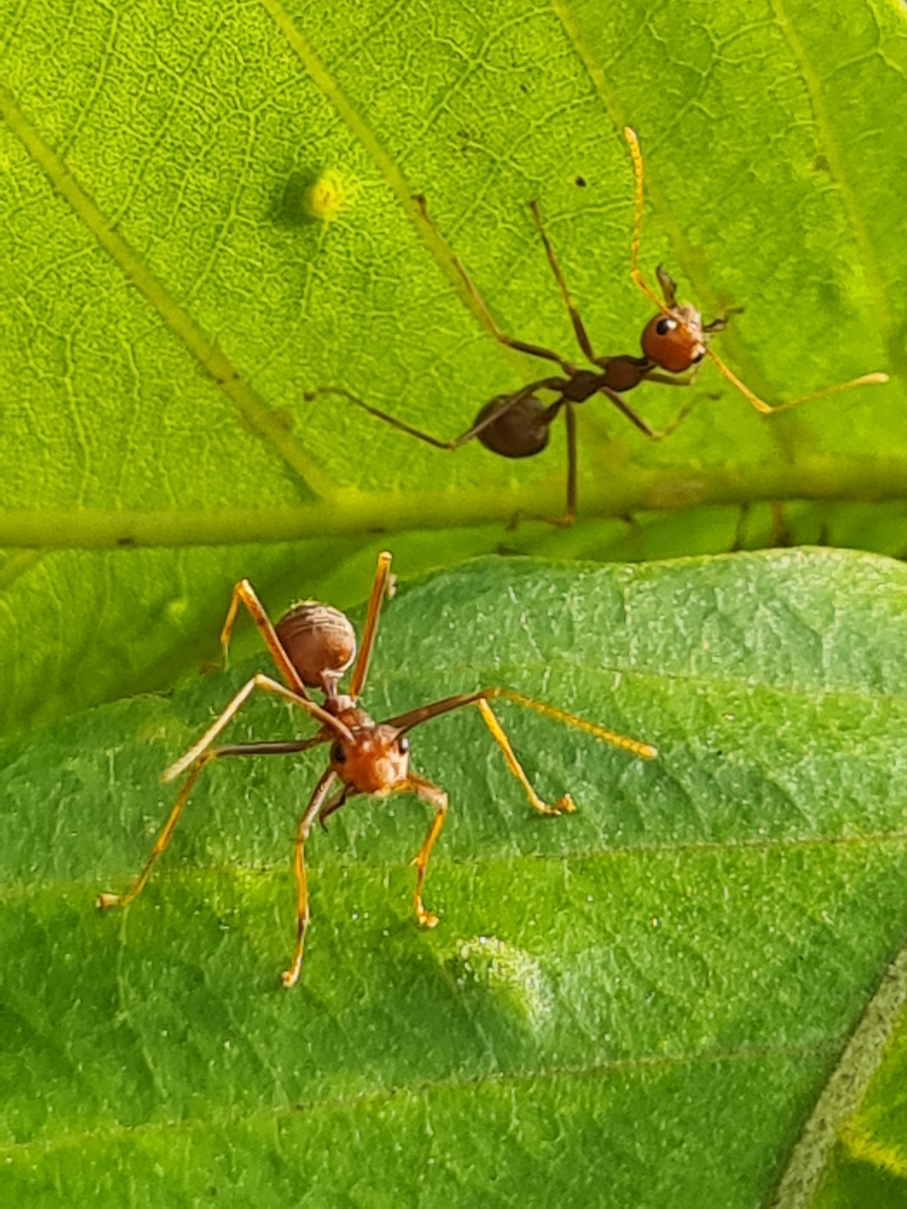


a.

**
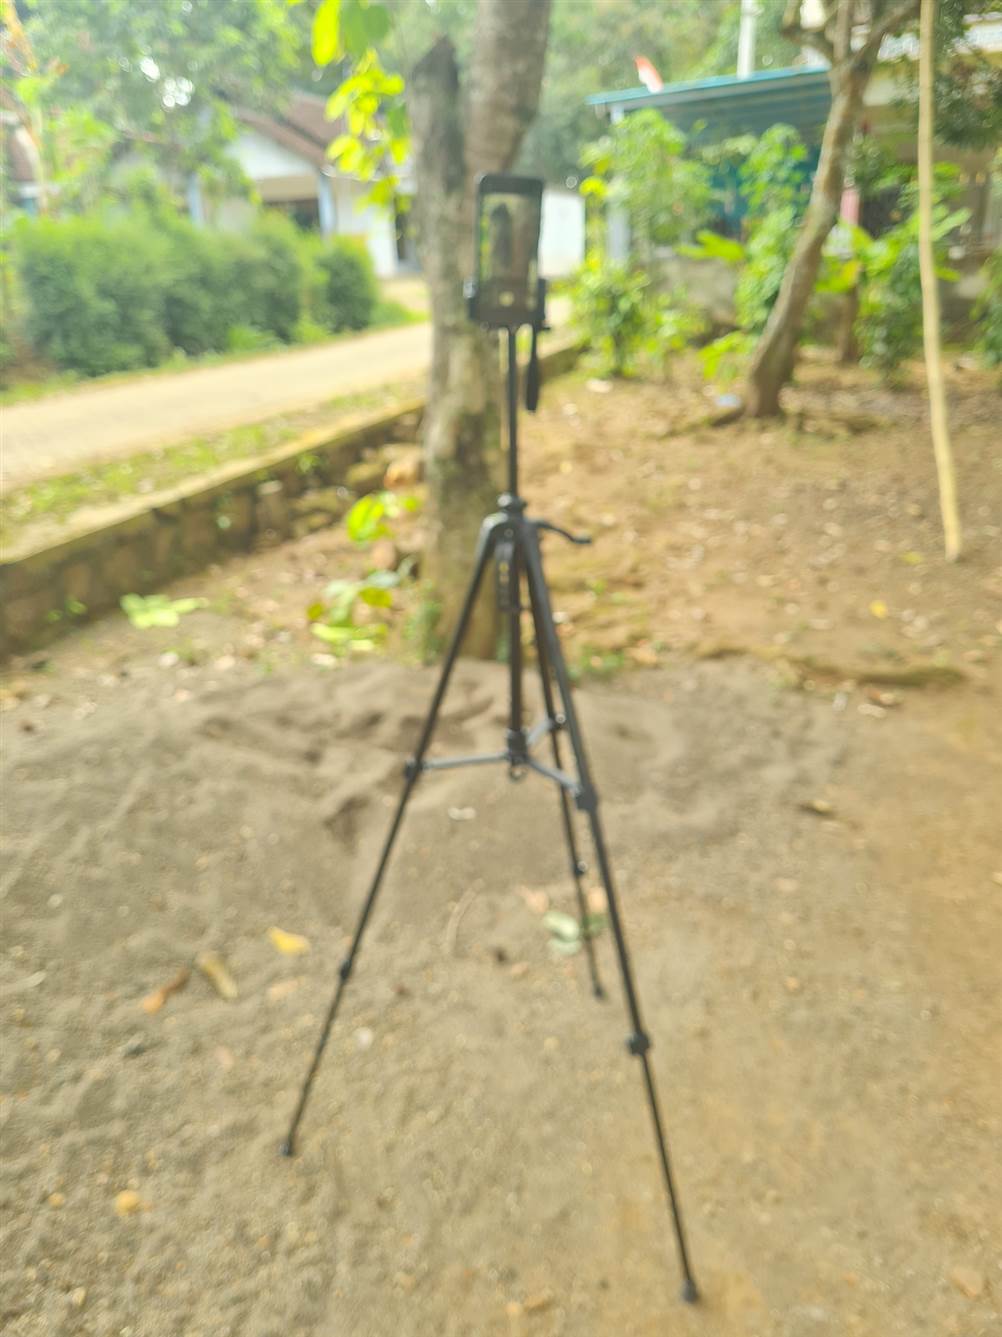

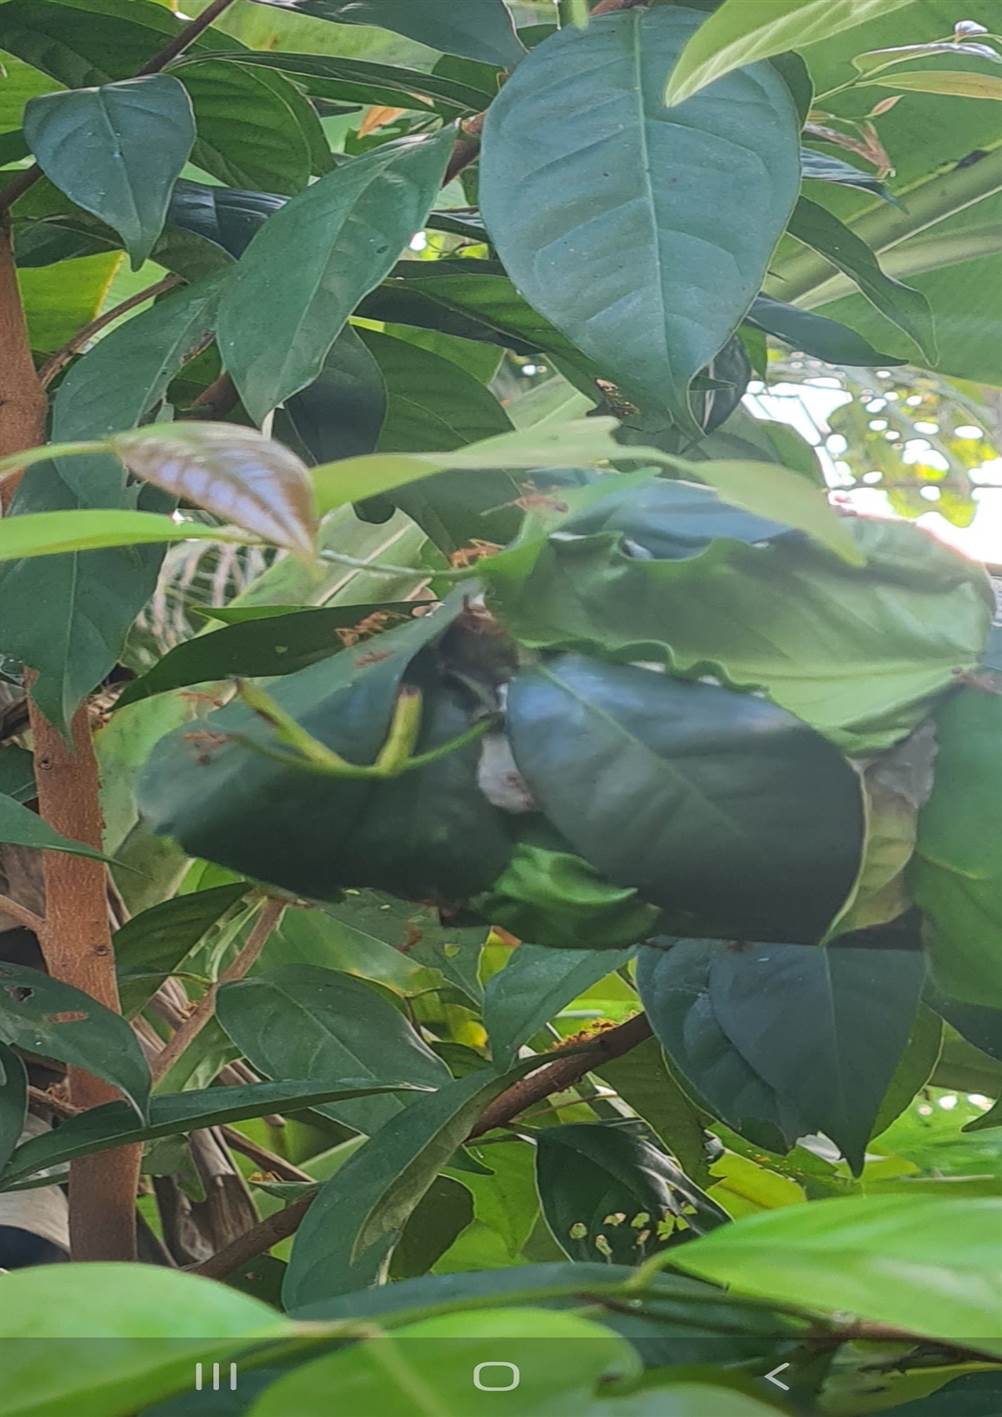
Fig. 6a-c.** *O. smaragdina* major worker's aggressive stance exhibiting mandible widely open in pre-attack behavior (a). Galaxy Samsung camera recorder (b). “Pohon Salam” *Syzygium polyanthum* plant, weaver ant colony occupied and used for the repelling test effect of the tea tree essence oil pure extract (c). Photo Credit (Moïse Pierre Exélis).

c.

d.

b.

B


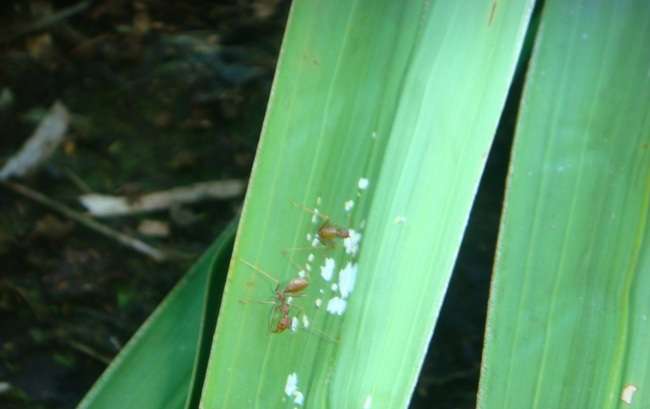


**Fig. 7.** Foraging for predation by distance detection. Foragers adopt a systematic aggressive behavior by raising their abdomen at 90°. Photo Credit (Moïse Pierre Exélis).
